# Supplementary material for: Increased Disease Calls for a Cost-Benefits Review of Marine Reserves
Source: PubMed Central journal article supplement (PMC3519872; doi:10.1371/journal.pone.0051615), 2012-12-11
Supplement: pone.0051615.s004.pdf [file pone.0051615.s004.pdf]

**Table S4. Data on shell disease severity in lobsters surveyed at Lundy Island during July 2010.** Lobsters are categorised according to zone and gender in order to assess the impact of a marine reserve (i.e. No-Take Zone) on the severity of shell disease in resident lobsters. Significant differences are highlighted in blue.

| Lobster category | Zone             | Shell disease severity (prevalence) |             |
|------------------|------------------|-------------------------------------|-------------|
|                  |                  | Low (%)                             | High (%)    |
| Males            | RZ<br>(N = 60)   | <b>18.3</b>                         | <b>1.7</b>  |
|                  | NTZ<br>(N = 176) | <b>27.3</b>                         | <b>10.8</b> |
|                  |                  | <i>P</i> = 0.226                    |             |
| Females          | RZ<br>(N = 61)   | <b>23.0</b>                         | <b>1.6</b>  |
|                  | NTZ<br>(N = 148) | <b>18.2</b>                         | <b>6.8</b>  |
|                  |                  | <i>P</i> = 0.448                    |             |

*P* = 0.030  
\*

RZ, Refuge zone; NTZ, No-take zone; %, percentage of lobsters from corresponding zone ; \* ; *P* < 0.05
