# Supplementary material for: Increased Disease Calls for a Cost-Benefits Review of Marine Reserves
Source: PLoS One. 2012 Dec 11;7(12):e51615. doi: 10.1371/journal.pone.0051615 (PMC3519872; doi:10.1371/journal.pone.0051615)
Supplement: Table S1 — Overall population and health differences between the lobster populations of the Refuge Zone (RZ) and No-Take Zone (NTZ) at Lundy Island, UK. Lobsters were sampled in May and July 2010. Significant differences between the RZ and NTZ are highlighted in blue. (PDF) [file pone.0051615.s001.pdf]

**Table S1. Overall population and health differences between the lobster populations of the Refuge Zone (RZ) and No-Take Zone (NTZ) at Lundy Island, UK.** Lobsters were sampled in May and July 2010. Significant differences between the RZ and NTZ are highlighted in blue.

| Zone                  | Population parameter         |                                  |                         |                                     | Health parameter (prevalence) |                      |                  |
|-----------------------|------------------------------|----------------------------------|-------------------------|-------------------------------------|-------------------------------|----------------------|------------------|
|                       | Large (>MLS)<br>lobsters (%) | Mean size<br>(CL in mm $\pm$ SE) | Gender ratio<br>(M : F) | Ovigerous<br>females<br>(% females) | Injury<br>(%)                 | Shell disease<br>(%) | Claw loss<br>(%) |
| <b>RZ</b><br>N = 152  | 35.5                         | 86.24 $\pm$ 0.91                 | 1 : 0.95                | 6.8                                 | 25.5                          | 17.8                 | 9.9              |
| <b>NTZ</b><br>N = 514 | 74.7                         | 98.64 $\pm$ 0.59                 | 1 : 0.84                | 30.8                                | 32.5                          | 26.8                 | 11.3             |
|                       | $P < 0.0001$<br>***          | $P < 0.0001$<br>***              | $P = 0.518$             | $P < 0.0001$<br>***                 | $P = 0.134$                   | $P = 0.023$<br>*     | $P = 0.768$      |

RZ; Refuge Zone; NTZ, No-Take Zone; MLS, Minimum Landing Size; CL, Carapace length; SE; Standard error; M, Male; F, Female; %, percentage of lobsters from corresponding zone; \*,  $P < 0.05$ ; \*\*\*,  $P < 0.001$ .
