# Supplementary material for: Increased Disease Calls for a Cost-Benefits Review of Marine Reserves
Source: PLoS One. 2012 Dec 11;7(12):e51615. doi: 10.1371/journal.pone.0051615 (PMC3519872; doi:10.1371/journal.pone.0051615)
Supplement: Table S3 — Overall comparison of shell disease severity in Lundy Island lobsters (Refuge zone vs. No-take Zone) surveyed during July 2010. Significant differences are highlighted in blue. (PDF) [file pone.0051615.s003.pdf]

**Table S3. Overall comparison of shell disease severity in Lundy Island lobsters (Refuge zone vs. No-take Zone) surveyed during July 2010.** Significant differences are highlighted in blue.

| Zone                  | Shell disease severity |          |
|-----------------------|------------------------|----------|
|                       | Low (%)                | High (%) |
| RZ ( <i>N</i> = 121)  | 20.7                   | 1.7      |
| NTZ ( <i>N</i> = 324) | 23.1                   | 9.0      |

P = 0.612

P = 0.006  
\*\*

RZ; Refuge Zone; NTZ, No-Take Zone; %, percent age of lobsters from corresponding zone; \*\*, P < 0.01.
